# Supplementary material for: Chitin/egg shell membrane@Fe3O4 nanocomposite hydrogel for efficient removal of Pb2+ from aqueous solution
Source: Royal Society of Chemistry journal article supplement (doi:10.1039/d1ra08744d), 2022-01-01
Supplement: d1ra08744d1.pdf [file d1ra08744d1.pdf]

## **Chitin/Egg Shell Membrane@Fe<sub>3</sub>O<sub>4</sub> Nanocomposite Hydrogel for Efficient Removal of Pb<sup>2+</sup> from Aqueous Solution**

Baoquan Jia\*<sup>1,3</sup>, Dingna Liu<sup>2</sup>, Chengyu Niu<sup>2</sup>, Qili Yu<sup>3</sup>, Jie Ren<sup>4</sup>, Qingye Liu\*<sup>2</sup>,

Haiqiang Wang<sup>1</sup>

1. Key Laboratory of Environment Remediation and Ecological Health, Ministry of Education, College of Environmental & Resources Science, Zhejiang University, Hangzhou 310058, China
2. School of Chemical Engineering and Technology, North University of China, NO.3 Xueyuan Road, Jiancaoping District, Taiyuan 030051, China
3. Hangzhou Xiaoshan Donghai Breeding Co., Ltd., Hangzhou 311200, China
4. School of Environment and Safety Engineering, North University of China, NO.3 Xueyuan Road, Jiancaoping District, Taiyuan 030051, China

[\*] To whom correspondence and reprint requests should be addressed.

E-mail: baoquanjia@foxmail.com; qingyeliu@126.com;

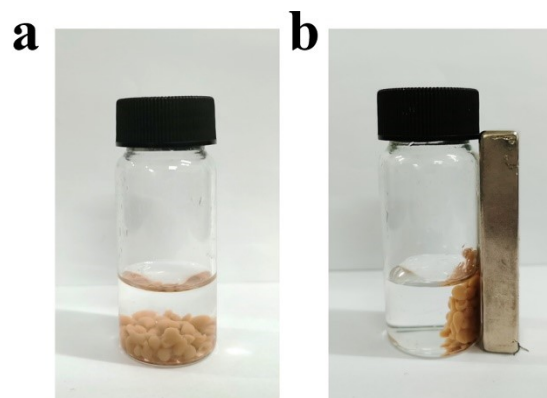

**Figure S1.** Photographs of Chitin/EM@Fe<sub>3</sub>O<sub>4</sub> nanocomposite hydrogel beads in aqueous solution before and after suffering from a magnetic field.

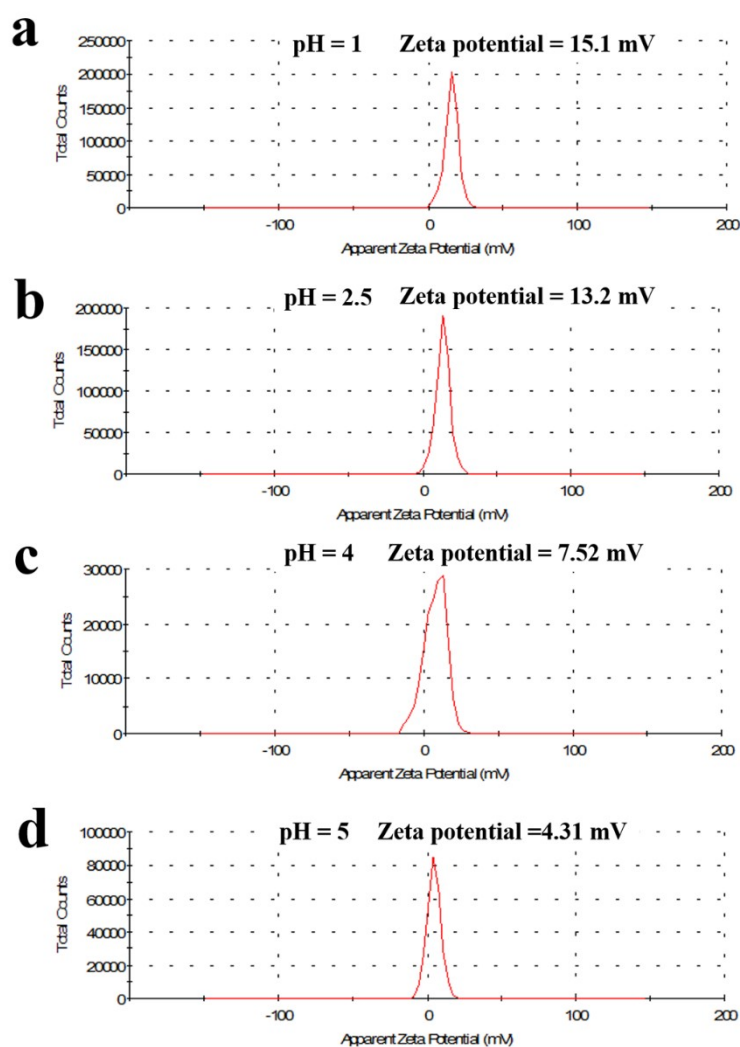

**Figure S2.** Zeta potentials of Chitin/EM@Fe<sub>3</sub>O<sub>4</sub> nanocomposite hydrogel samples in aqueous solution with different pH values at 20 °C, (a-d) pH = 1.0, 2.5, 4.0 and 5.0, respectively.
